# Supplementary material for: Novel DFO-SAM on mesoporous silica for iron sensing. Part I. Synthesis optimization and characterization of the material
Source: Royal Society of Chemistry journal article supplement (doi:10.1039/c4an00179f), 2014-05-23
Supplement: c4an00179f1.pdf [file c4an00179f1.pdf]

The data of all iron (III) sorption experiments on the DFO SAMMS prepared in this work, fitted through the Langmuir (continuous line) and Freundlich (dotted line) equation using a non-linear fitting program, are reported in the following figures. The results are summarized in tables 1 and 2.

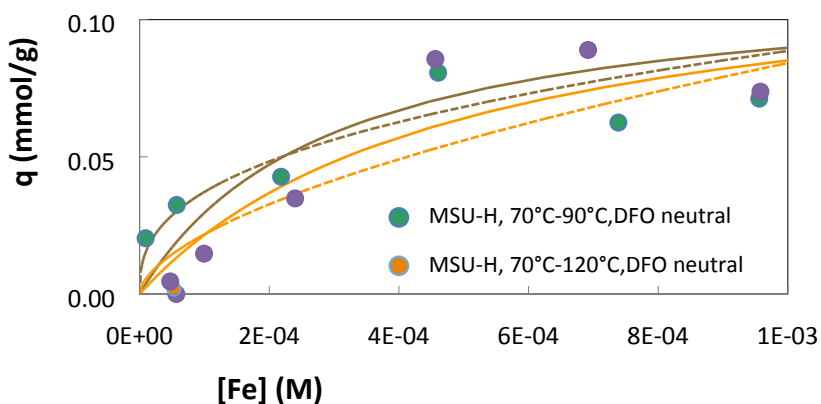

**Figure 1s:** Isotherm sorption profiles for DFO SAMMS on MSU-H type synthesized using the following conditions: 70°-90°C and 70-120°C using DFO neutral. Langmuir (continuous line) and Freundlich (dotted line) equation are reported. Profile obtained at 25.0(1)°C in 0.1M KNO<sub>3</sub> at pH 2.50(5).

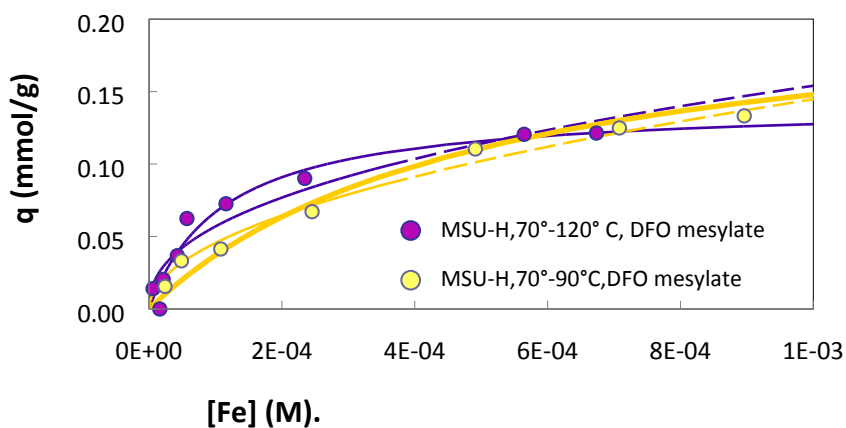

**Figure 2s:** Isotherm sorption profiles for DFO SAMMS on MSU-H type synthesized using the following conditions: 70°-90°C and 70-120°C using DFO mesylate. Langmuir (continuous line) and Freundlich (dotted line) equation are reported. Profile obtained at 25.0(1)°C in 0.1M KNO<sub>3</sub> at pH 2.50(5).

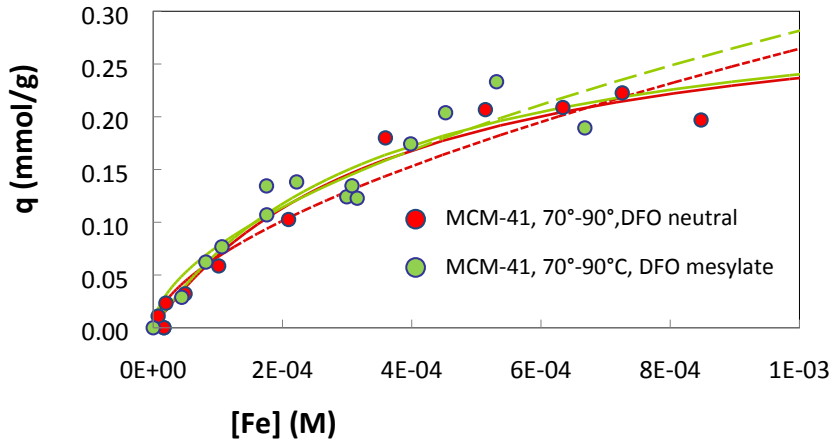

**Figure 3s:** Isotherm sorption profiles for DFO SAMMS on MCM-41 type synthesized using the following conditions: 70°-90°C using DFO neutral and mesylate. Langmuir (continuous line) and Freundlich (dotted line) equation are reported. Profile obtained at 25.0(1)°C in 0.1M KNO<sub>3</sub> at pH 2.50(5).

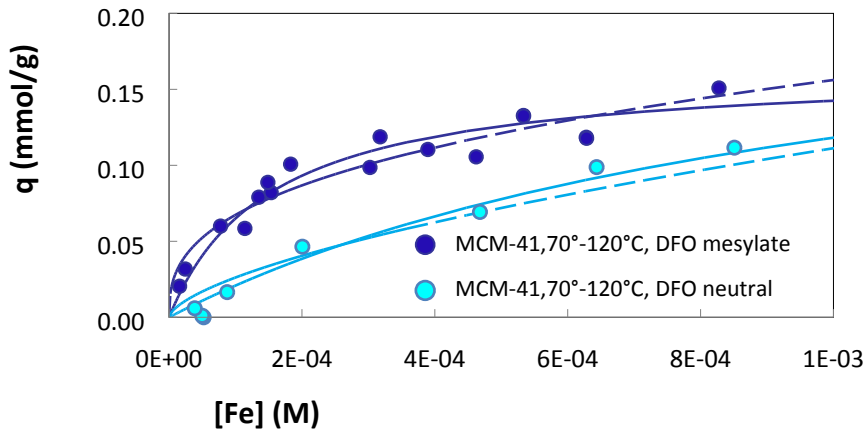

**Figure 4s:** Isotherm sorption profiles for DFO SAMMS on MCM-41 type synthesized using the following conditions: 70°-120°C using DFO neutral and mesylate. Langmuir (continuous line) and Freundlich (dotted line) equation are reported. Profile obtained at 25.0(1)°C in 0.1M KNO<sub>3</sub> at pH 2.50(5).
